# Supplementary material for: Difference in the deactivation of Au catalysts during ethanol transformation when supported on ZnO and on TiO2
Source: Royal Society of Chemistry journal article supplement (doi:10.1039/c8ra00314a), 2018-01-01
Supplement: c8ra00314a1.pdf [file c8ra00314a1.pdf]

## Supporting information for:

### Difference in the deactivation of Au catalysts during the ethanol transformation when supported on ZnO and on TiO<sub>2</sub>

M. V. Morales,<sup>a</sup> E. Asedegbega Nieto,<sup>a\*</sup> E. Castillejos-López,<sup>a</sup> B. Bachiller-Baeza,<sup>b</sup> A. Guerrero-Ruiz<sup>a</sup>

<sup>a</sup> *Department of Inorganic Chemistry and Chemical Engineering, UNED, Madrid, Spain*

<sup>b</sup> *Institute of Catalysis and Petrochemistry, CSIC, Madrid, Spain*

\*Corresponding author: [easedegbega@ccia.uned.es](mailto:easedegbega@ccia.uned.es)

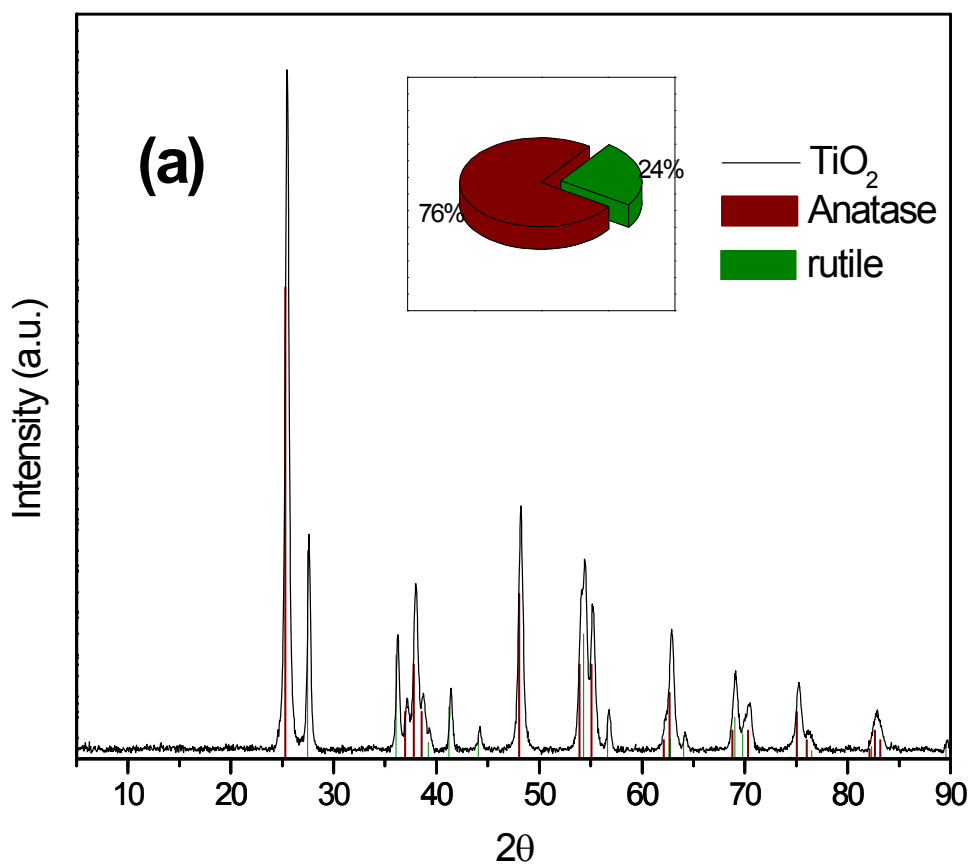

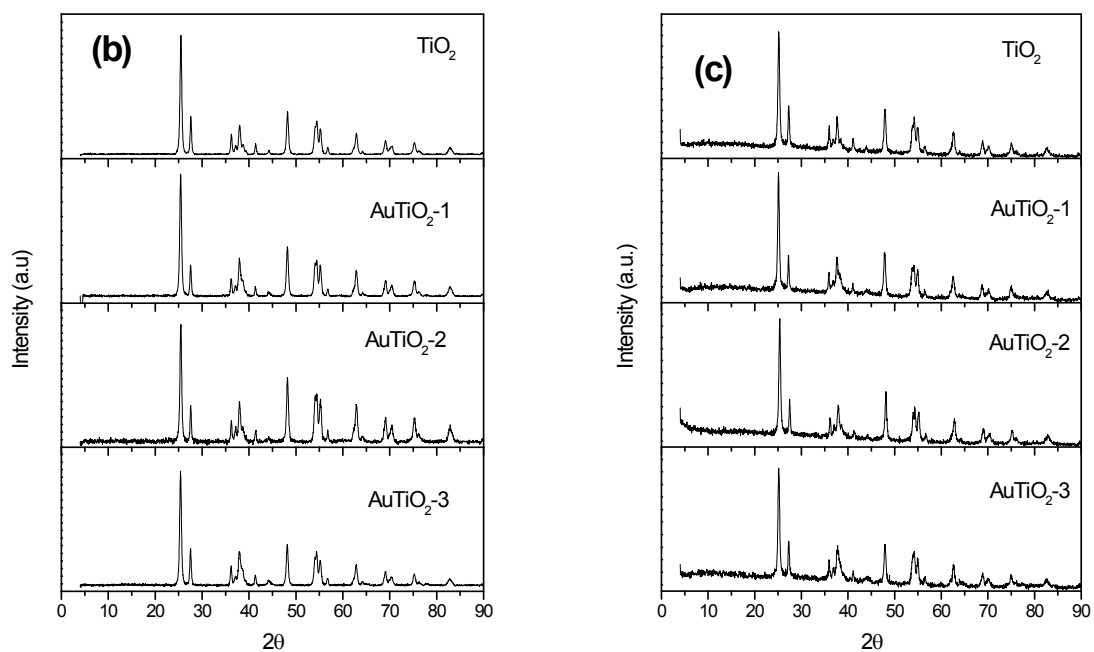

Fig. S1. XRD patterns of (a) support, (b) fresh catalysts and (c) used catalysts of  $\text{TiO}_2$  series.

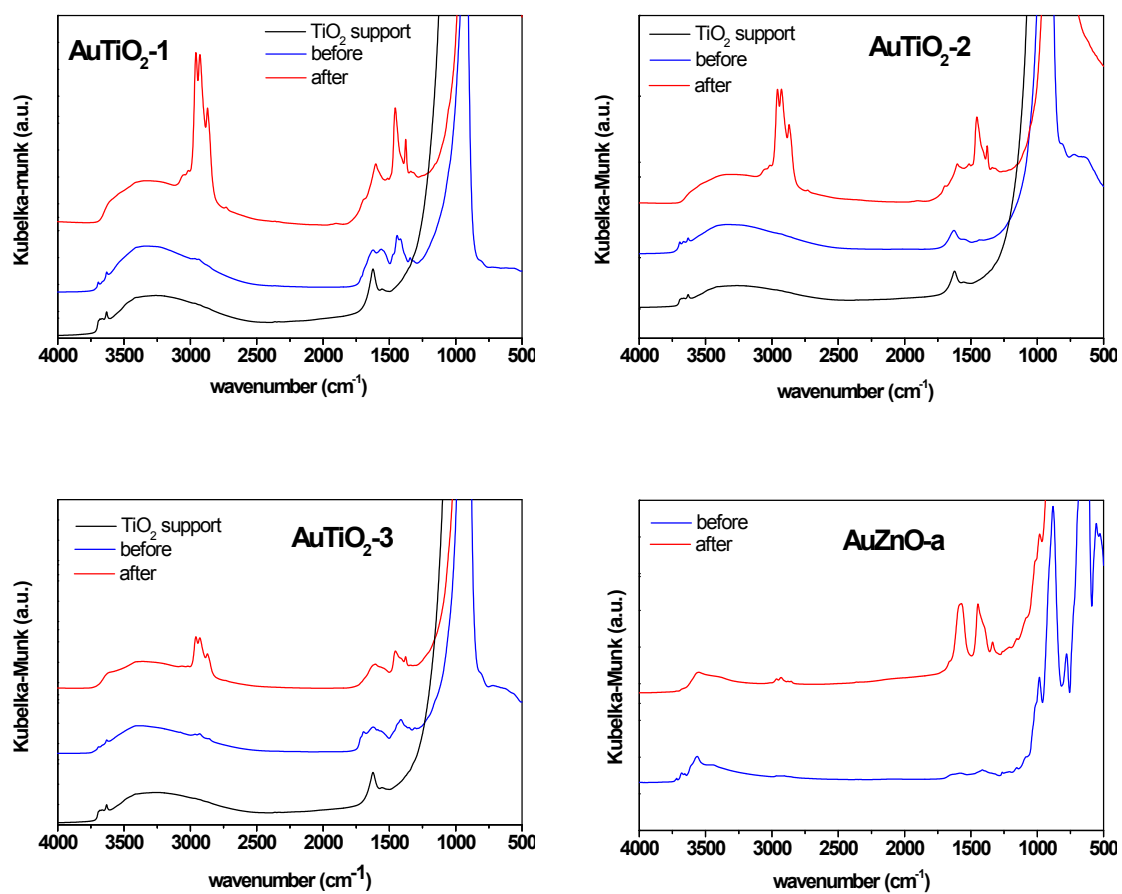

Fig. S2. DRIFT spectra of fresh and used AuTiO<sub>2</sub> and AuZnO catalysts.

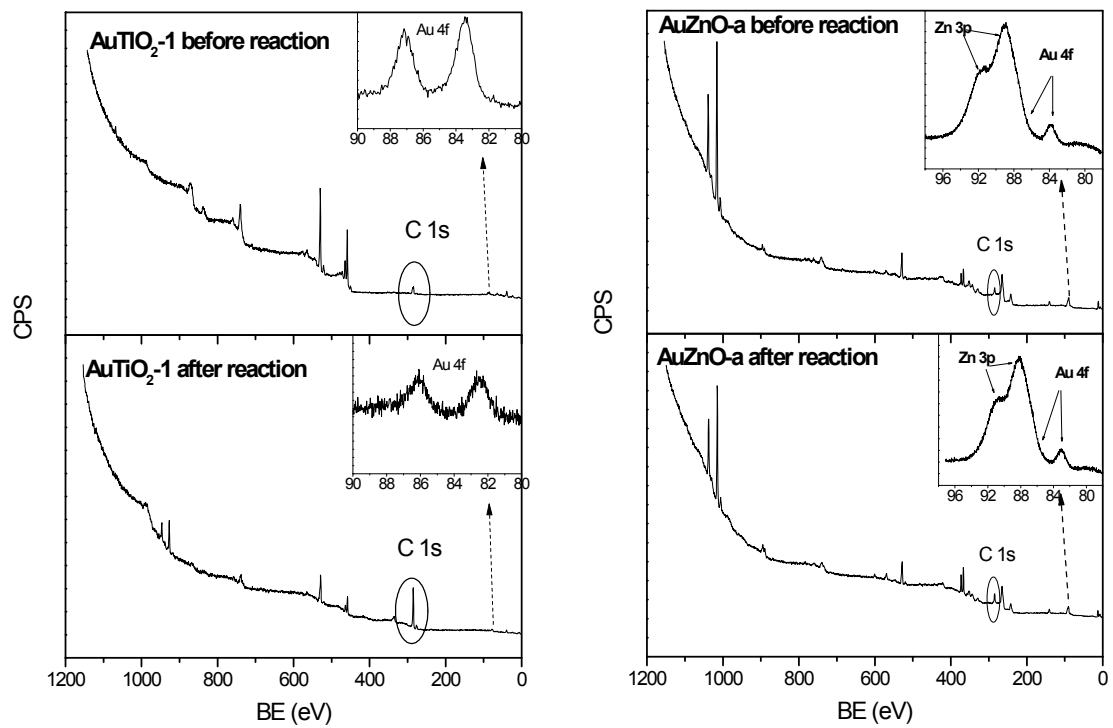

Fig. S3. XPS spectra of fresh and used AuTiO<sub>2</sub>-1 and AuZnO-a samples
